# Supplementary material for: Superconductivity in Ca3H2 electride at moderate pressure
Source: Royal Society of Chemistry journal article supplement (doi:10.1039/d3tc01089a), 2023-01-01
Supplement: d3tc01089a1.pdf [file d3tc01089a1.pdf]

## Supplementary Materials for

### Superconductivity in $\text{Ca}_3\text{H}_2$ electrider at moderate pressure

Ziqiang Chen<sup>1</sup>, Teng Xie<sup>1</sup>, Pengfei Liu<sup>2</sup>, Rui Xiong<sup>1</sup>, Zhou Cui<sup>1</sup>, Zihao Xu<sup>1</sup>, Cuilian Wen<sup>1,\*</sup>, Baotian Wang<sup>2,3\*</sup>, and Baisheng Sa<sup>1,\*</sup>

<sup>1</sup>*Multiscale Computational Materials Facility, and Key Laboratory of Eco-materials Advanced Technology, College of Materials Science and Engineering, Fuzhou University, Fuzhou 350108, P. R. China*

<sup>2</sup>*Institute of High Energy Physics, Chinese Academy of Sciences, Beijing 100049, China*

<sup>3</sup>*Collaborative Innovation Center of Extreme Optics, Shanxi University, Taiyuan 030006, P. R. China*

**Corresponding Authors:** \*clwen@fzu.edu.cn (C. Wen); \*wangbt@ihep.ac.cn (B. Wang); \*bssa@fzu.edu.cn (B. Sa)

Table S1. The atomic Wyckoff positions for  $P63/mmc$   $\text{Ca}_3\text{H}_2$  at different pressures

| Pressure<br>(GPa) | Atom | Site | x    | y    | z    |
|-------------------|------|------|------|------|------|
| 0                 | Ca1  | 2c   | 0.67 | 0.33 | 0.75 |
|                   | Ca2  | 4f   | 0.33 | 0.67 | 0.91 |
|                   | H1   | 4f   | 0.67 | 0.33 | 0.63 |
| 6.8               | Ca1  | 2c   | 0.67 | 0.33 | 0.75 |
|                   | Ca2  | 4f   | 0.33 | 0.67 | 0.91 |
|                   | H1   | 4f   | 0.67 | 0.33 | 0.63 |
| 10                | Ca1  | 2c   | 0.67 | 0.33 | 0.75 |
|                   | Ca2  | 4f   | 0.33 | 0.67 | 0.91 |
|                   | H1   | 4f   | 0.67 | 0.33 | 0.63 |
| 14                | Ca1  | 2c   | 0.67 | 0.33 | 0.75 |
|                   | Ca2  | 4f   | 0.33 | 0.67 | 0.91 |
|                   | H1   | 4f   | 0.67 | 0.33 | 0.62 |
| 19.5              | Ca1  | 2c   | 0.67 | 0.33 | 0.75 |
|                   | Ca2  | 4f   | 0.33 | 0.67 | 0.92 |
|                   | H1   | 4f   | 0.67 | 0.33 | 0.62 |

Table S2.  $T_c$  and dimension of reported electrides at selected pressures

| Compounds                                      | Dimension | Pressures (GPa)   | $T_c$ (K) | Reference |
|------------------------------------------------|-----------|-------------------|-----------|-----------|
| <i>I-43d</i> C12A7:e <sup>-</sup>              | 0D        | ambient condition | 0.4       | 1         |
| <i>Cmcm</i> Al <sub>5</sub> Si                 | 0D        | 15                | 0.15      | 2         |
| <i>Pnma</i> Ca <sub>2</sub> S                  | 0D        | 50                | 0.26      | 3         |
| <i>C2/m</i> Li <sub>9</sub> Te                 | 0D        | 50                | 4.01      | 4         |
| <i>C2/m</i> Li <sub>10</sub> Se                | 0D        | 50                | 16        | 5         |
| <i>P2<sub>1</sub>/m</i> Ca <sub>3</sub> S      | 0D        | 60                | 7.04      | 3         |
| <i>R-3m</i> Li <sub>6</sub> C                  | 0D        | 80                | 10        | 6         |
| <i>C2/m</i> Li <sub>10</sub> Te                | 0D        | 100               | 4         | 4         |
| <i>I4/mmm</i> YXe <sub>2</sub>                 | 0D        | 100               | 0.3       | 7         |
| <i>Pbam</i> YXe                                | 0D        | 150               | 3.9       | 7         |
| <i>I4/mcm</i> Y <sub>3</sub> Xe                | 0D        | 150               | 6.5       | 7         |
| <i>C2/m</i> Li <sub>6</sub> Al                 | 0D        | 150               | 29        | 8         |
| <i>P6/mmm</i> AsLi <sub>7</sub>                | 0D        | 150               | 38.4      | 9         |
| <i>Fm-3m</i> Li <sub>8</sub> Au                | 0D        | 250               | 73.1      | 10        |
| <i>Immm</i> Li <sub>5</sub> S                  | 0D        | 500               | 8.6       | 11        |
| <i>P63/mcm</i> Zr <sub>5</sub> Sb <sub>3</sub> | 1D        | ambient condition | 2.3       | 12        |
| <i>P63/mcm</i> Nb <sub>5</sub> Ir <sub>3</sub> | 1D        | ambient condition | 9.4       | 13        |
| <i>P63/mmc</i> Y <sub>3</sub> Si               | 1D        | 50                | 14.49     | 14        |
| <i>P63/mmc</i> Ca <sub>3</sub> Si              | 1D        | 100               | 17.6      | 15        |
| <i>R-3m</i> Y <sub>2</sub> C                   | 2D        | ambient condition | 0.9       | 16        |
| <i>R-3m</i> Ba <sub>2</sub> N                  | 2D        | ambient condition | 3.4       | 17        |
| <i>P63/mmc</i> Ca <sub>3</sub> H <sub>2</sub>  | 2D        | 19.5              | 8.4       | This work |
| <i>P6/mmm</i> Li <sub>5</sub> Si               | 2D        | 100               | 7.2       | 18        |
| <i>P-1</i> Li <sub>11</sub> P <sub>2</sub>     | 2D        | 200               | 4.63      | 19        |
| <i>C2/c</i> Li <sub>5</sub> P                  | 2D        | 200               | 2.61      | 19        |
| <i>C2/c</i> Li <sub>8</sub> P                  | 2D        | 200               | 7.15      | 19        |
| <i>P6/mmm</i> Li <sub>5</sub> C                | 2D        | 210               | 48.3      | 20        |
| <i>C2/c</i> Li <sub>6</sub> P                  | 2D        | 270               | 39.3      | 19        |
| <i>C2/m</i> Li <sub>15</sub> P <sub>2</sub>    | 2D        | 300               | 18.5      | 19        |

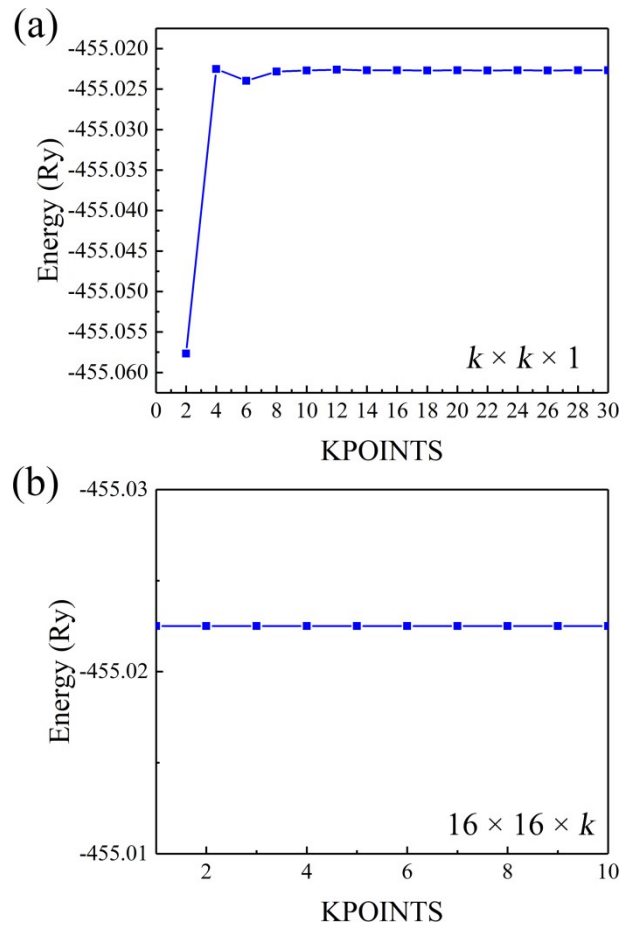

Fig. S1. The  $k$ -point test results for (a)  $c$  and (b)  $a/b$  directions.

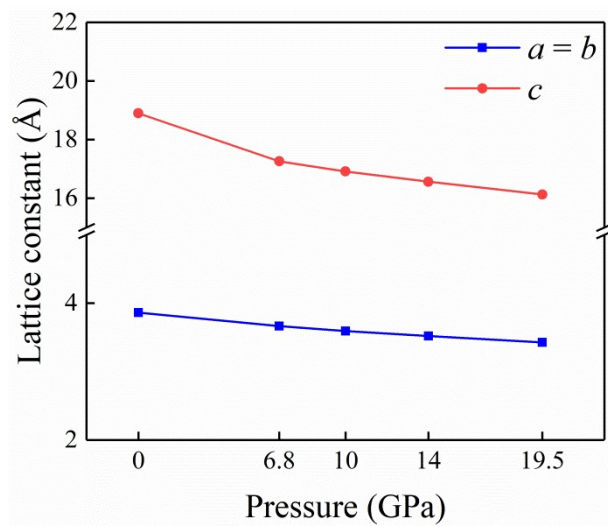

Fig. S2. The lattice constants of  $\text{Ca}_3\text{H}_2$  at different pressures.

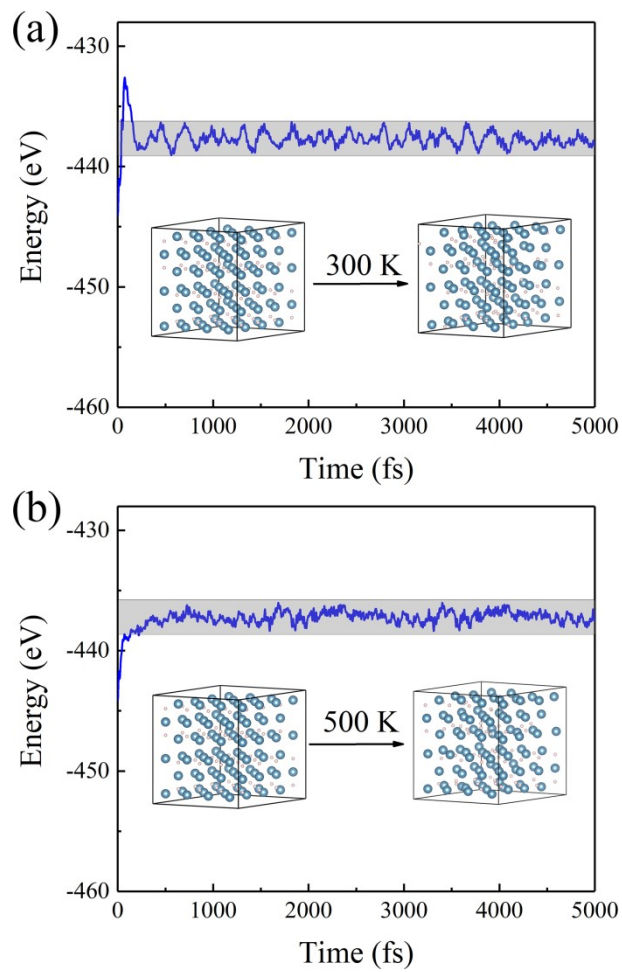

Fig. S3. Free energy evolution for  $\text{Ca}_3\text{H}_2$  at (a) 300 K and (b) 500 K in ab initio molecules dynamic simulations under ambient condition.

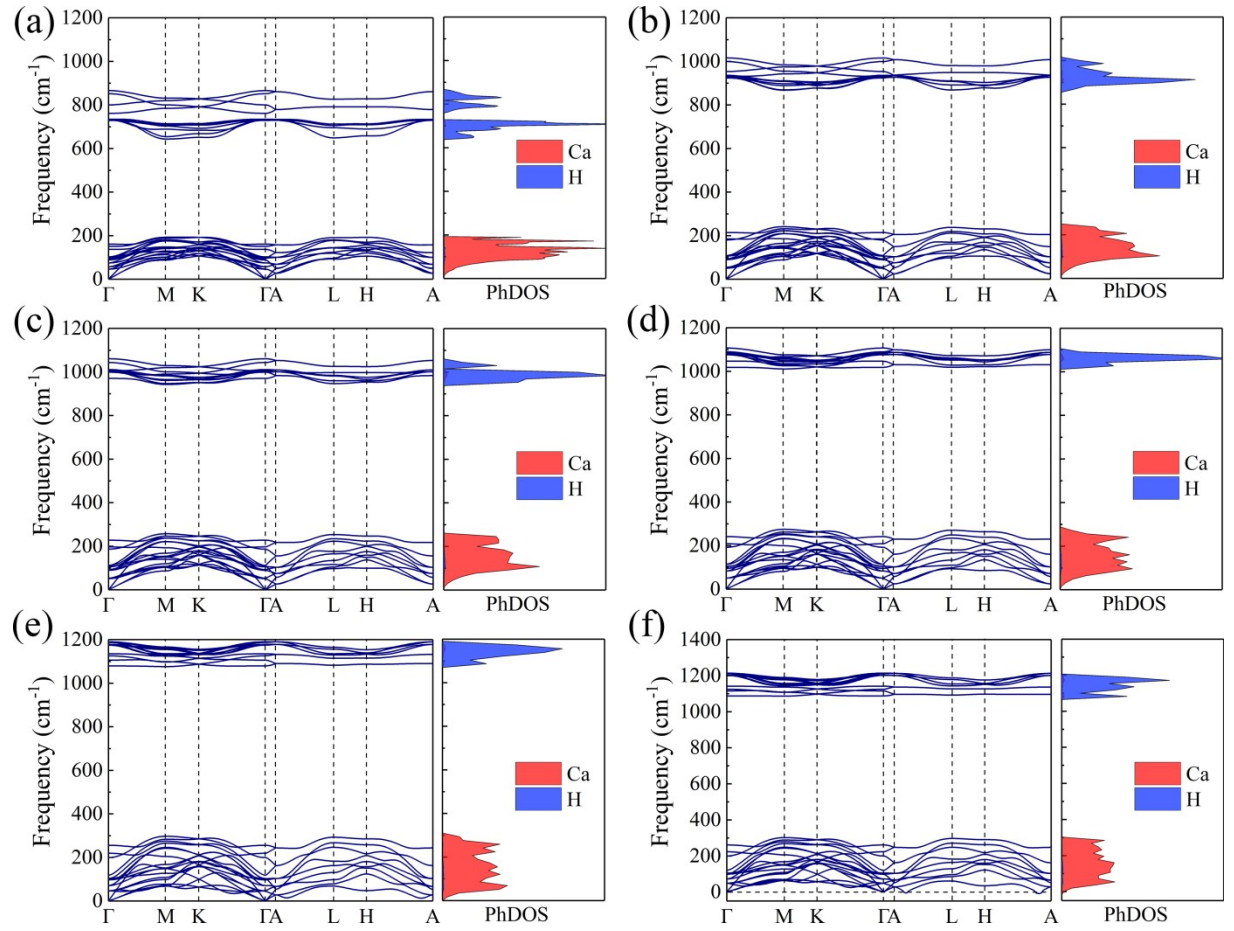

Fig. S4. Phonon dispersions and the phonon DOS for  $\text{Ca}_3\text{H}_2$  (a) under ambient condition and at (b) 6.8 GPa, (c) 10 GPa, (d) 14 GPa, (e) 19.5 GPa, and (f) 20 GPa, respectively.

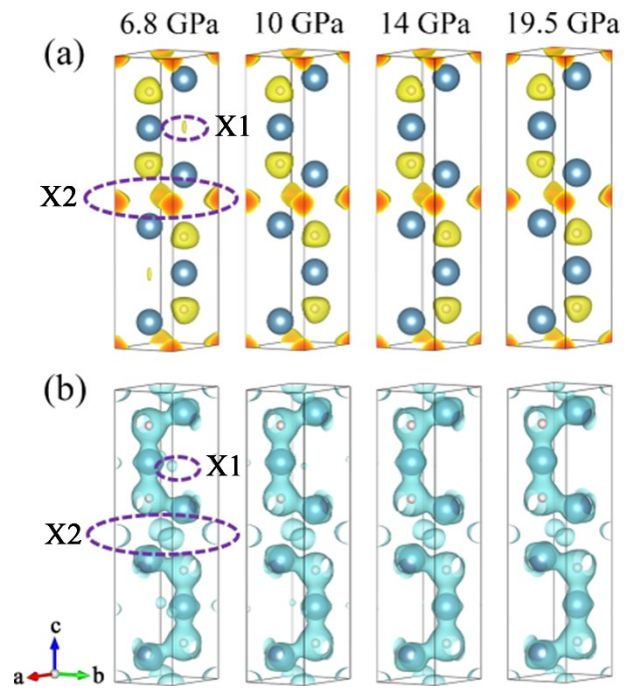

Fig. S5. (a) The ELF with an isosurface value of 0.75 and (b) ESDP with an isosurface value of -0.1 V for  $\text{Ca}_3\text{H}_2$  at different pressures. X1, and X2 denote the different anionic electrons.



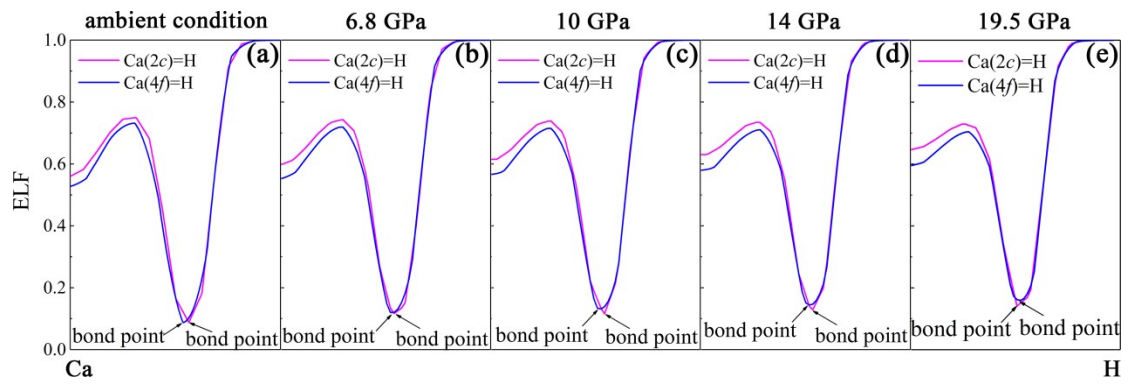

Fig. S6. The ELF 2D line profiles and bond points of the Ca–H bonds in  $\text{Ca}_3\text{H}_2$  under different pressures.

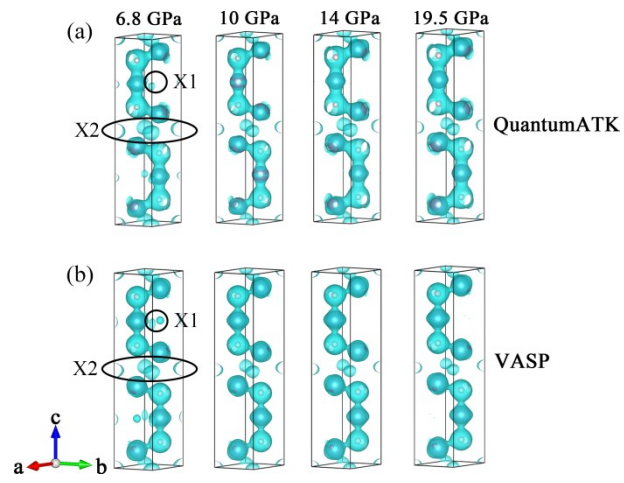

Fig. S7. The ESDP obtained separately from (a) QuantumATK and (b) (added as Fig. S4 in revised manuscript) VASP calculations.

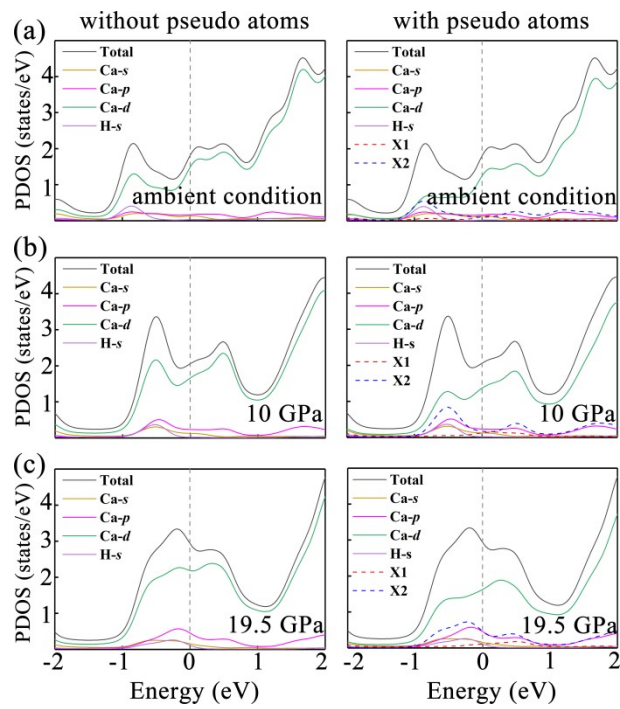

Fig. S8. The DOS with and without pseudo atoms under selected pressures.

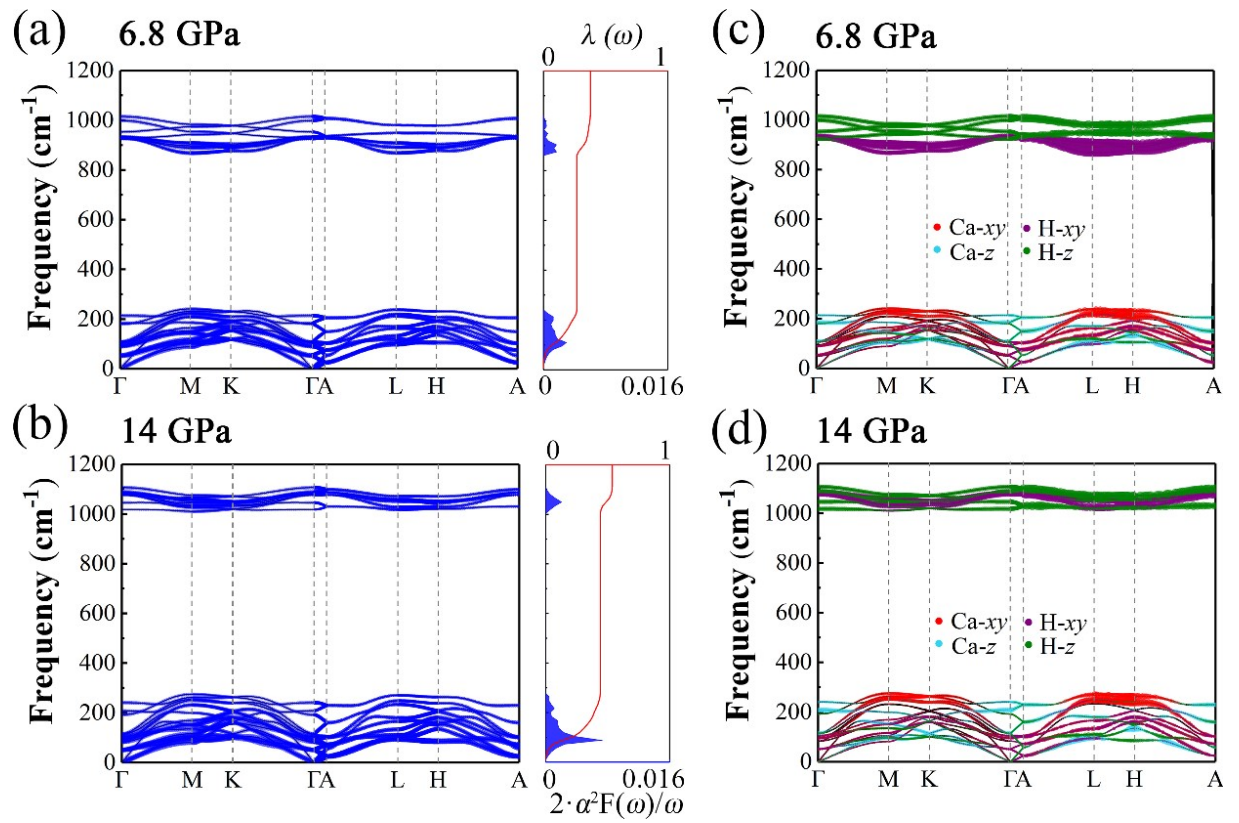

Fig. S9. Phonon dispersions weighted by the magnitude of the EPC, the mode-resolved Eliashberg spectral function  $2 \cdot \alpha^2 F(\omega)/\omega$ , and the frequency-dependent electron-phonon coupling parameters  $\lambda(\omega)$  for  $\text{Ca}_3\text{H}_2$  at (a) 6.8 GPa, and (b) 14 GPa.

The sizes of blue dots are proportional to the phonon linewidth  $\gamma_{\text{qv}}$ . Phonon dispersions weighted by the vibrational modes of different atoms for  $\text{Ca}_3\text{H}_2$  at (c) 6.8 GPa and (d) 14 GPa.

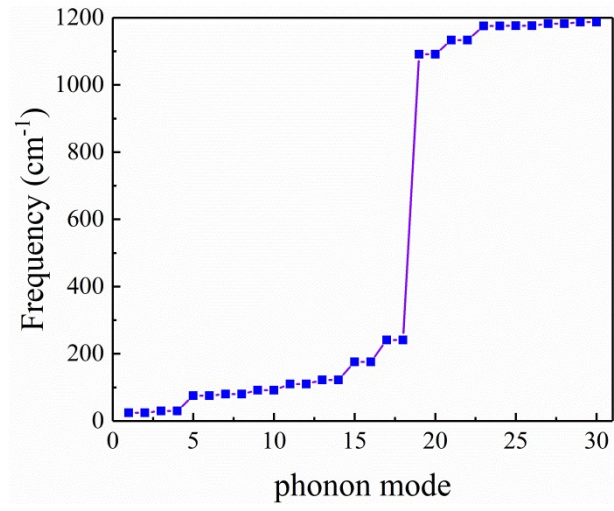

Fig. S10. The single  $q$ -point phonon test results.

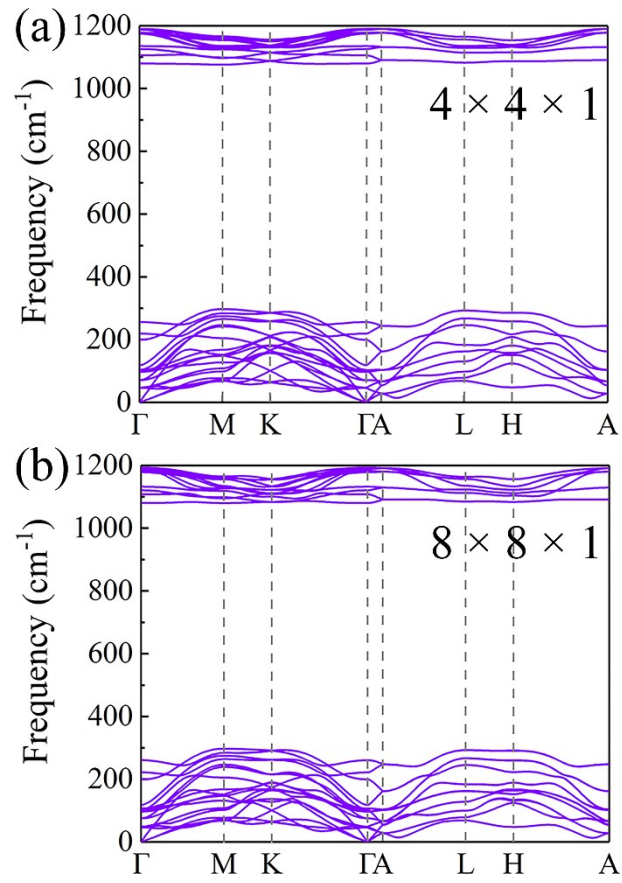

Fig. S11. Phonon dispersion comparison of  $\text{Ca}_3\text{H}_2$  at different  $q$ -points of (a)  $4 \times 4 \times 1$ , and (b)  $8 \times 8 \times 1$  under 19.5 GPa.

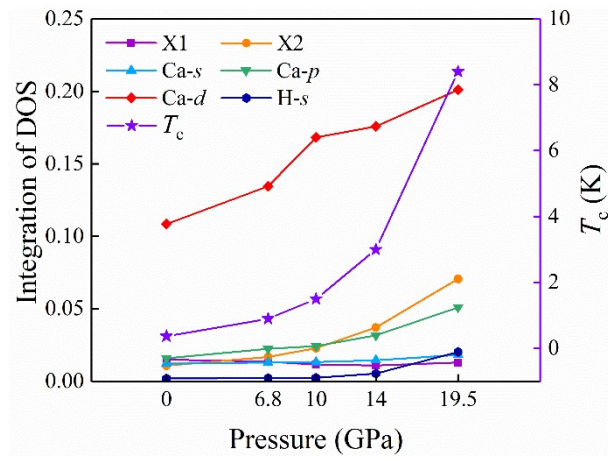

Fig. S12. Integration of density of states for interstitial anion electrons.

## Reference

- 1 M. Miyakawa, S. W. Kim, M. Hirano, Y. Kohama, H. Kawaji, T. Atake, H. Ikegami, K. Kono, and H. Hosono, *J. Am. Chem. Soc.*, 2007,**129**, 7270-7271.
- 2 Q. Wang, K. Zhao, S. Wei, H. Liu, and S. Zhang, *Mater. Today Phys.*, 2022,**28**, 100853.
- 3 Y.-X. Liu, C. Wang, S. Han, X. Chen, H.-R. Sun, and X.-B. Liu, *Chin. Phys. Lett.*, 2021,**38**, 036201.
- 4 X. H. Zhang, F. Li, A. Bergara, and G. C. Yang, *Phys. Rev. B*, 2021,**104**, 134505.
- 5 X. Zhang, Y. Zhao, A. Bergara, and G. Yang, *J. Chem. Phys.*, 2022,**156**, 194112.
- 6 Z. Liu, Q. Zhuang, F. Tian, D. Duan, H. Song, Z. Zhang, F. Li, H. Li, D. Li, and T. Cui, *Phys. Rev. Lett.*, 2021,**127**, 157002.
- 7 D. Zhou, D. Szcześniak, J. Yu, C. Pu, and X. Tang, *J. Phys. Chem. C*, 2019,**123**, 9323-9330.
- 8 X. Wang, Y. Wang, J. Wang, S. Pan, Q. Lu, H.-T. Wang, D. Xing, and J. Sun, *Phys. Rev. Lett.*, 2022,**129**, 246403.
- 9 Z. Wan, W. Xu, T. Yang, and R. Zhang, *Phys. Rev. B*, 2022,**106**, L060506.
- 10 X. Zhang, Y. Yao, S. Ding, A. Bergara, F. Li, Y. Liu, X.-F. Zhou, and G. Yang, *Phys. Rev. B*, 2023,**107**, L100501.
- 11 C. Kokail, C. Heil, and L. Boeri, *Phys. Rev. B*, 2016,**94**, 060502.
- 12 B. Lv, X. Zhu, B. Lorenz, F. Wei, Y. Xue, Z. Yin, G. Kotliar, and C. Chu, *Phys. Rev. B*, 2013,**88**, 134520.
- 13 Y. Zhang, B. Wang, Z. Xiao, Y. Lu, T. Kamiya, Y. Uwatoko, H. Kageyama, and H. Hosono, *npj Quantum Mater.*, 2017,**2**, 45.
- 14 J. Zhang, G. Chen, and H. Liu, *J. Phys. Chem. L*, 2021,**12**, 10388-10393.
- 15 B. Sa, R. Xiong, C. Wen, Y.-L. Li, P. Lin, Q. Lin, M. Anpo, and Z. Sun, *J. Phys. Chem. C*, 2020,**124**, 7683-7690.
- 16 Y. Ge, S. Guan, and Y. Liu, *New J. Phys.*, 2017,**19**, 123020.
- 17 X. L. Qiu, J.-F. Zhang, H.-C. Yang, Z.-Y. Lu, and K. Liu, *Phys. Rev. B*, 2022,**105**, 165101.
- 18 J. Y. You, B. Gu, G. Su, and Y. P. Feng, *J. Am. Chem. Soc.*, 2022,**144**, 5527-5534.
- 19 Z. Zhao, S. Zhang, T. Yu, H. Xu, A. Bergara, and G. Yang, *Phys. Rev. Lett.*, 2019,**122**, 097002.
- 20 Z. S. Pereira, G. M. Faccin, and E. Z. da Silva, *J. Phys. Chem. C*, 2021,**125**, 8899-8906.
